# Supplementary material
Source: PubMed Central journal article supplement (PMC3793618)

**Supplemental Figure 1. 17 $\beta$ -estradiol does not exhibit LXR agonist activity.** CCF-STTG1 cells were seeded in 12-well plates at 450K cells/well and treated with 17 $\beta$ -estradiol at 1 pM, 100 pM, 1 nM, 10 nM, 1  $\mu$ M and 10  $\mu$ M for 24h, along with DMSO alone (0) as a negative control and 1  $\mu$ M of GW3965 (GW) as a positive control. **(A)** Representative Western blots of media apoE, cellular apoE, cellular ABCA1, and  $\beta$ -actin as a loading control. Band intensity was quantitated by densitometry and expressed as fold change relative to the DMSO control. Data represent mean and SD of fold differences of media apoE **(B)**, cellular apoE **(C)** and cellular ABCA1 **(D)**. Graphs illustrate two independent experiments, each in duplicate, analysed by one-way ANOVA with a Tukey's post test. \* represents  $p < 0.05$ .

**Supplemental Figure 2. Effects of progesterone and lynestrenol in primary murine mixed glia.** Primary mixed glial cells were re-seeded in 12-well plates and pre-treated with 5  $\mu$ M of RU486 or DMSO alone for 1h, followed by treatment of DMSO alone (Ctrl), 10  $\mu$ M of progesterone (Prog), 10  $\mu$ M of lynestrenol (Lyn) or 1  $\mu$ M of GW3965 (GW), with or without 5  $\mu$ M RU486 for another 72h. Western blotting **(A)** was used to measure media apoE **(B)**, cellular protein levels of apoE **(C)** and ABCA1 **(D)** in whole cell lysates. Band intensity was quantitated by densitometry and expressed as fold change relative to the DMSO control without RU486 co-treatment. Real-time quantitative PCR was used to measure apoE **(E)** and ABCA1 **(F)** mRNA levels in whole cell lysates. Data represent mean and SD of fold differences from six independent experiments for B, five experiments for C and D, three experiments for E and F. Drug effect of progestins and GW3965 was analysed by two-way ANOVA with a Tukey's post test. Effect of RU486 was analysed by two-way ANOVA with a Sidak's column comparison. \* represents  $p < 0.05$ , \*\* represents  $p < 0.01$ , and \*\*\* represents  $p < 0.0001$ .

**Supplemental Figure 3. Effects of progesterone and lynestrenol in apoE3- and apoE4-expressing immortalized astrocytes.** Immortalized astrocytes from human apoE3 and apoE4 knock-in mice were seeded in 12-well plates and pre-treated with 5  $\mu$ M of RU486 or DMSO alone for 1h, followed by treatment of DMSO alone (Ctrl), 1  $\mu$ M of progesterone (Prog), lynestrenol (Lyn) or GW3965 (GW) with or without 5  $\mu$ M RU486 for another 24h. Western blotting (**A, B**) was used to measure media apoE (**C, D**), cellular protein levels of apoE (**E, F**) and ABCA1 (**G, H**) in whole cell lysates. Band intensity was quantitated by densitometry and expressed as fold change relative to the DMSO control without RU486 co-treatment. Data represent mean and SD of fold differences from three independent experiments for C-F, four experiments for G and H. Drug effect of progestins and GW3965 was analysed by two-way ANOVA with a Tukey's post test. Effect of RU486 was analysed by two-way ANOVA with a Sidak's column comparison. \* represents  $p < 0.05$  and \*\*\* represents  $p < 0.0001$ .

# Supplemental Figure 1

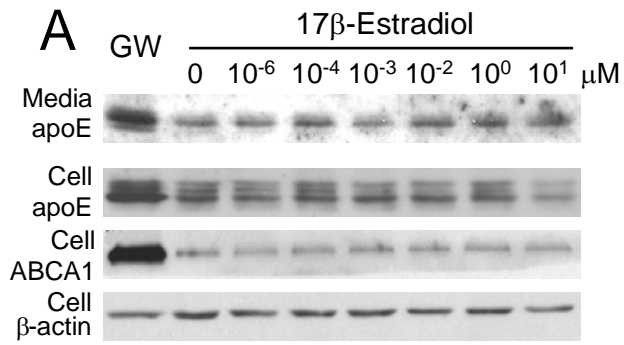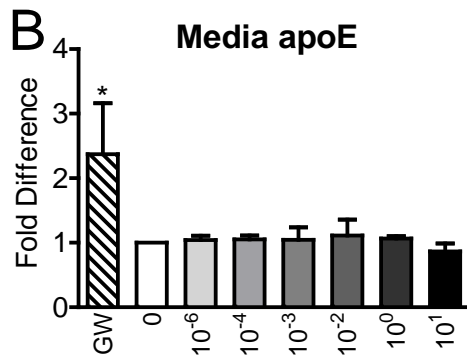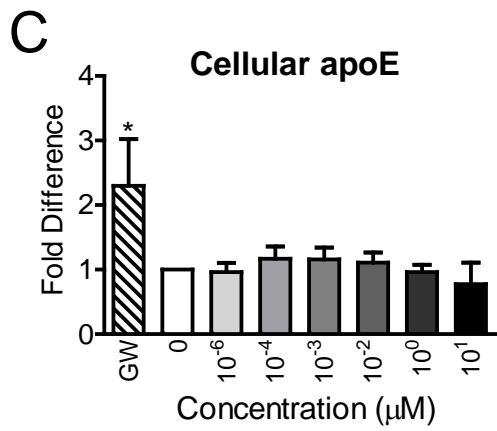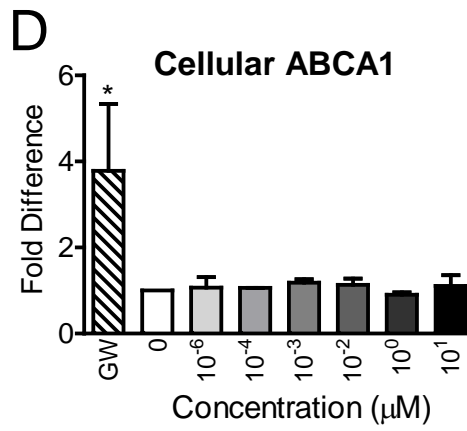

# Supplemental Figure 2

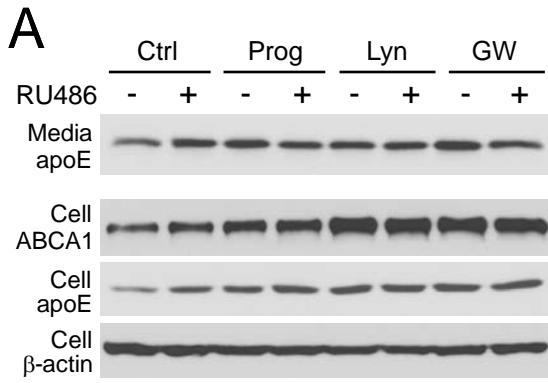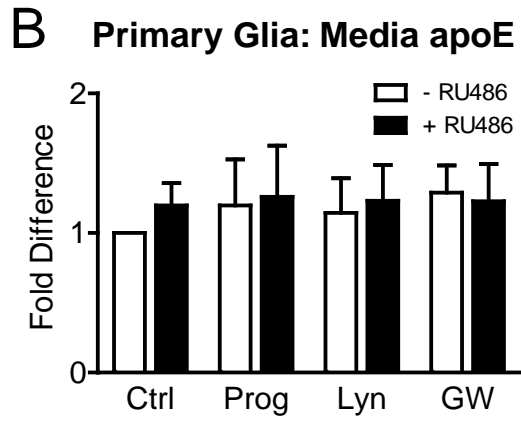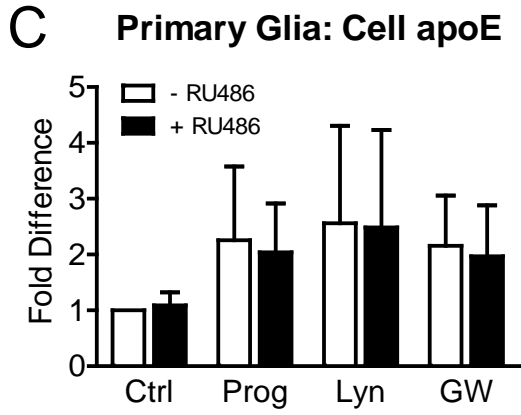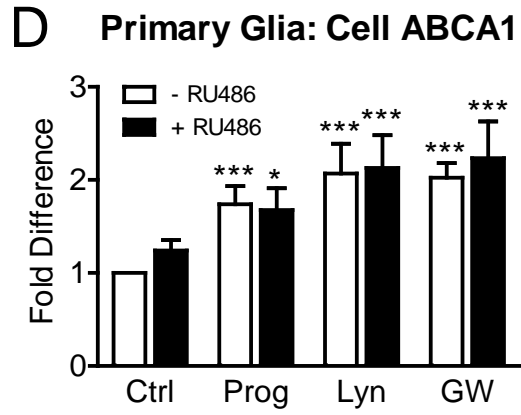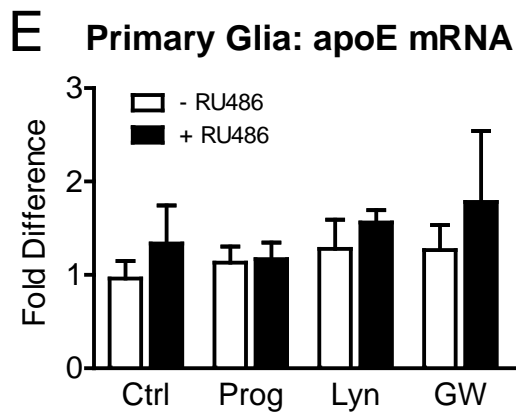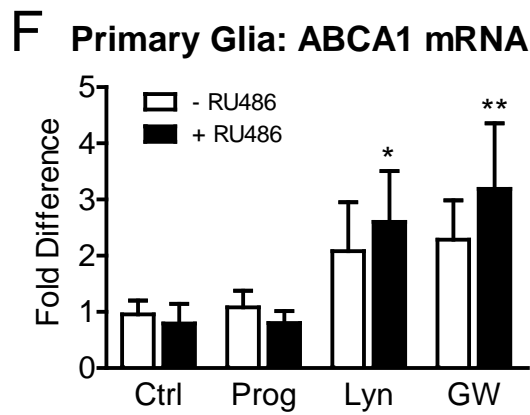

# Supplemental Figure 3

## A ApoE3-expressing astrocytes

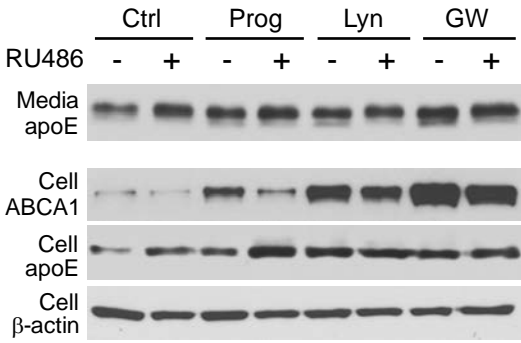

## B ApoE4-expressing astrocytes

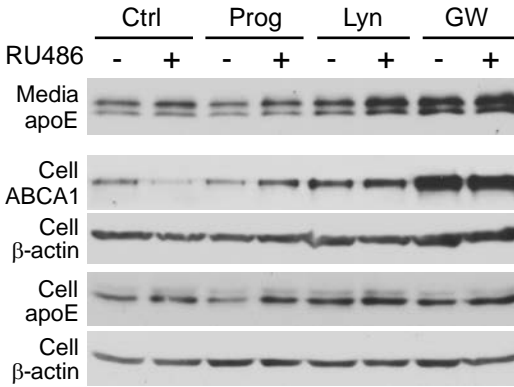

## C E3: Media apoE

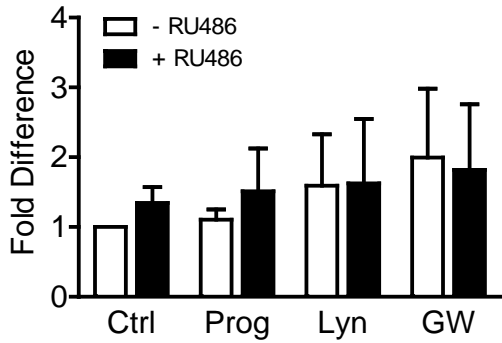

## D E4: Media apoE

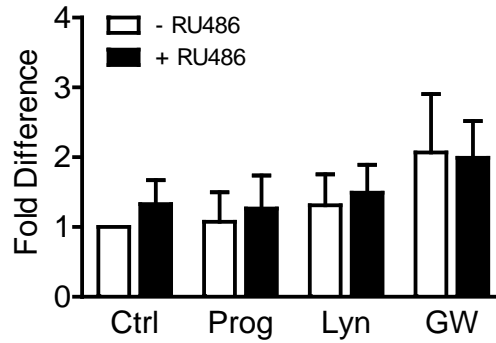

## E E3: Cellular apoE

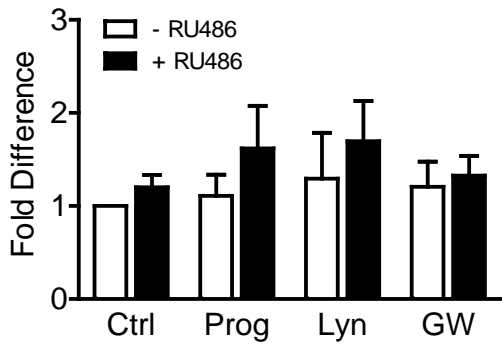

## F E4: Cellular apoE

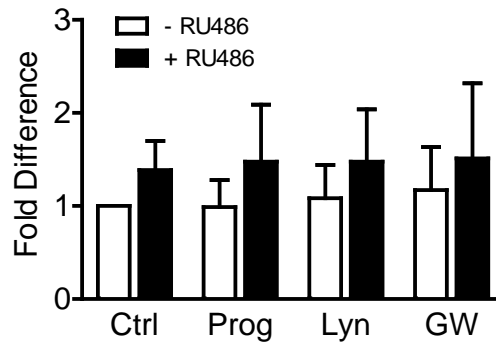

## G E3: Cellular ABCA1

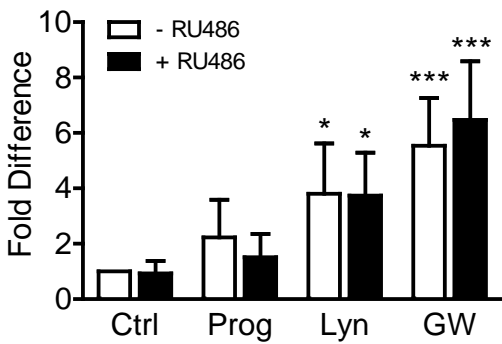

## H E4: Cellular ABCA1

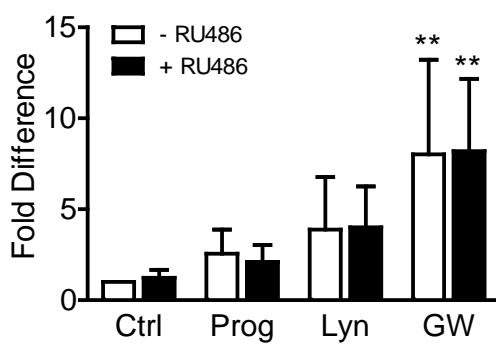

Supplement: supp_M042473_jlr.M042473-1.pdf [file supp_M042473_jlr.M042473-1.pdf]
